# Supplementary material for: Rational design and SERS properties of side-by-side, end-to-end and end-to-side assemblies of Au nanorods
Source: Royal Society of Chemistry journal article supplement (doi:10.1039/c1jm11193k), 2011-01-01
Supplement: c1jm11193k.pdf [file c1jm11193k.pdf]

## Electronic Supplementary Information

### Rational Design and SERS properties of Side-by-Side, End-to-End and End-to-Side Assemblies of Au Nanorods

Lubin Zhong,<sup>a</sup> Xi Zhou,<sup>\*a</sup> Shixiong Bao,<sup>b</sup> Yanfeng Shi,<sup>a</sup> Yan Wang,<sup>a</sup> Shimin Hong,<sup>a</sup> Yuancan Huang,<sup>a</sup>  
Xiang Wang<sup>b</sup>, Zhaoxiong Xie<sup>b</sup> and Qiqing Zhang<sup>\*ac</sup>

<sup>a</sup> *Research Center of Biomedical Engineering, Department of Biomaterials, College of Materials, The Key Laboratory of Biomedical Engineering of Fujian Province, Xiamen University, Xiamen, 361005, People's Republic of China,*

<sup>b</sup> *State Key Laboratory for Physical Chemistry of Solid Surfaces & Department of Chemistry, College of Chemistry and Chemical Engineering, Xiamen University, Xiamen, 361005, People's Republic of China,*

<sup>c</sup> *Institute of Biomedical Engineering, Chinese Academy of Medical Sciences and Peking Union Medical College, Tianjin, 300192, People's Republic of China,*

*\*Corresponding authors: xizhou@xmu.edu.cn, zhangqiq@xmu.edu.cn Tel: 86-18659241056; Fax: 86 05922185299.*

#### Section 1. Synthesis of AuNRs

Fig. S1a shows the TEM image of the as-prepared AuNRs, which are isolated and randomly dispersed. The average length, diameter, and aspect ratio, determined from  $\approx 300$  AuNRs on TEM images, are  $38 \pm 4$  nm,  $11 \pm 2$  nm, and  $3.5 \pm 0.5$ , respectively. The zeta potential of the AuNRs was measured to be around +50 mV due to CTAB capping on the side face of AuNRs. The AuNRs concentration is estimated to be  $\approx 0.8$  nM according to previously determined molar extinction coefficients.<sup>1</sup> Fig. S1b shows the UV-vis spectra of the prepared AuNRs. The ensemble transverse and longitudinal plasmon wavelengths are 512 and 780 nm, respectively.

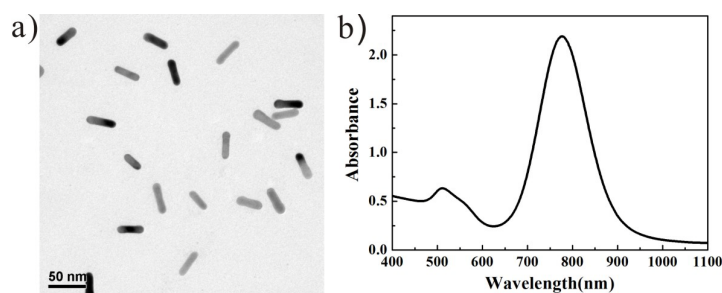

**Fig. S1** The TEM image (a) and the UV-vis absorption spectra (b) of AuNRs.

## Section2. Determination of SERS enhancement factor

The surface enhancement factor (EF) was calculated based on Eq 1<sup>2</sup>:

$$EF = \frac{I_{SERS} / N_{SERS}}{I_{NRS} / N_{NRS}} = \frac{I_{SERS} / (C_{SERS} \times V_{SERS})}{I_{NRS} / (C_{NRS} \times V_{NRS})} = \frac{I_{SERS} / C_{SERS}}{I_{NRS} / C_{NRS}} \quad (1)$$

Where  $I_{SERS}$  and  $I_{NRS}$  denote the integrated intensities for the strongest band of the measured SERS and normal Raman scattering (NRS), from MGITC dissolved in water.  $N_{SERS}$  and  $N_{NRS}$  represent the number of MGITC excited by a laser beam in SERS and NRS, respectively.  $V_{SERS}$  and  $V_{NRS}$  is the volume irradiated by a laser beam in SERS and NRS, respectively.  $C_{SERS}$  is the concentration of MGITC in SERS-AuNRs solution, where we assumed all MGITC was bound.  $C_{NRS}$  is the concentration of MGITC in water. The strongest Raman peak at  $1174 \text{ cm}^{-1}$  ( $\nu_9$  benzene in plane)<sup>3</sup> was chosen for EF calculation.

The ratio of surface enhancement factors between assembled AuNRs and a single AuNR was calculated based on Eq 2:

$$R_{EF} = \frac{EF_{Assembly}}{EF_{Single}} = \frac{\frac{I_{SERS^{Assembly}} / N_{SERS^{Assembly}}}{I_{NRS} / N_{NRS}}}{\frac{I_{SERS^{single}} / N_{SERS^{single}}}{I_{NRS} / N_{NRS}}} = \frac{I_{SERS^{Assembly}}}{I_{SERS^{single}}} \quad (2)$$

$R_{EF}$  represents the ratio of surface enhancement factors between assembled AuNRs and a single AuNR.  $EF_{Assembly}$  and  $EF_{Single}$  represent the surface enhancement factor of assembled AuNRs and a single AuNR (no assembly), respectively.

### Section 3. Reproducible experiments of AuNR assemblies in different orientations and their corresponding SERS properties

In order to ensure reproducibility of our own results, all measurements were performed over three repeats for each AuNR assembly motif. Figure S2 shows the UV-vis absorption spectra, TEM images and SERS from separately prepared AuNRs assembly. Both the assembly behavior and their corresponding SERS properties which include the position and intensity of all the observed modes showed a remarkable reproducibility.

Enhancement in signal intensity was further quantified by estimating the signal enhancement factor (EF). As shown in Table S1, the EF for EE, ES and SS motifs are about  $4\sim 5 \times 10^4$ ,  $1.4 \times 10^4$  and  $0.3 \times 10^4$  respectively, and the reproducibility of this work is good enough.

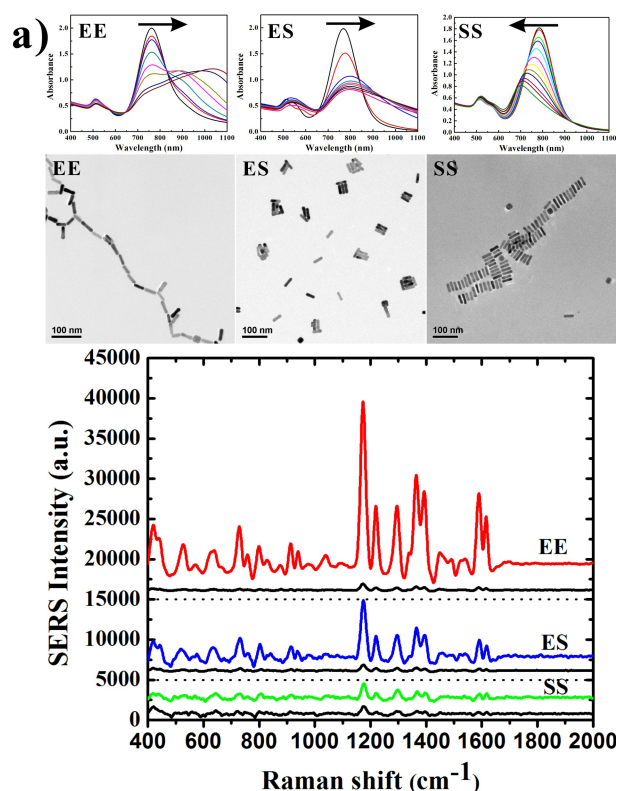

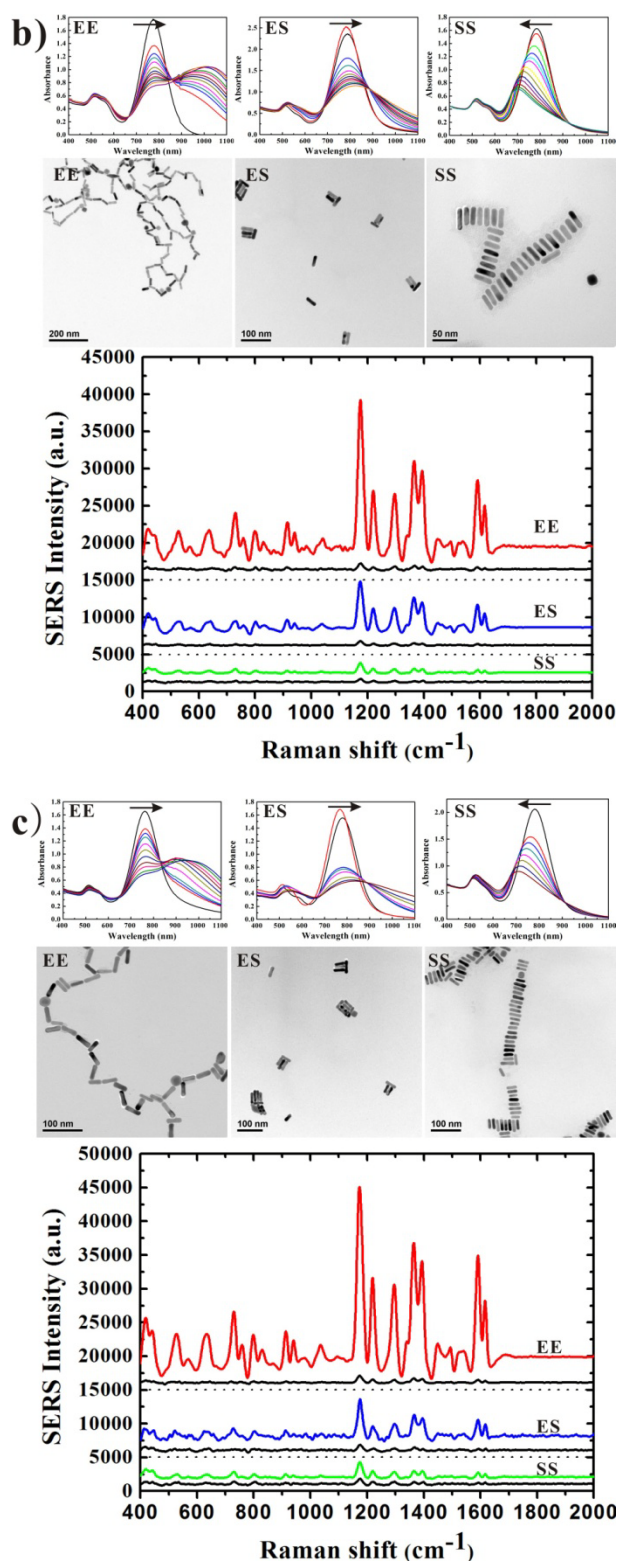

**Fig. S2** Reproducible experiments (a, b, c) from different, independently prepared AuNR assembly samples in EE, ES and SS orientations. The UV-vis absorption spectra (top), TEM images (middle) and SERS spectrum (bottom). The arrow represents the direction of the transverse plasmon peak shift.

Supplementary Material (ESI) for Journal of Materials Chemistry

This journal is (c) The Royal Society of Chemistry 2011

**Table S1** SERS enhancement factor for separately prepared AuNRs assembly in different orientations. Abbreviations:  $R_{EF}$  = the ratio of surface enhancement factors between assembled AuNRs and a single AuNR

| Sample | Assembly motif | EF                 | $R_{EF}$ |
|--------|----------------|--------------------|----------|
| a      | EE             | $4.0 \times 10^4$  | 26.96    |
| a      | ES             | $1.4 \times 10^4$  | 10.48    |
| a      | SS             | $0.32 \times 10^4$ | 1.75     |
| b      | EE             | $4.0 \times 10^4$  | 29.64    |
| b      | ES             | $1.2 \times 10^4$  | 12.45    |
| b      | SS             | $0.26 \times 10^4$ | 3.73     |
| c      | EE             | $5.0 \times 10^4$  | 26.32    |
| c      | ES             | $1.4 \times 10^4$  | 7.88     |
| c      | SS             | $0.4 \times 10^4$  | 3.50     |

#### References:

1. H. W. Liao and J. H. Hafner, *Chem. Mater.*, 2005, **17**, 4636.
2. (a) R. Bin, G. K. Liu, X. B. Lian, Z. L. Yang and Z. Q. Tian, *Anal. Bioanal. Chem.*, 2007, **338**, 29; (b) C. T. Nguyen, J. T. Nguyen, S. Rutledge, J. Zhang, C. Wang and G. C. Walker, *Cancer Lett.*, 2010, **292**, 91; (c) K. L. Wustholz, A. I. Henry, J. M. McMahon, R. G. Freeman, N. Valley, M. E. Piotti, M. J. Natan, G. C. Schatz and R. P. Van Duyne, *J. Am. Chem. Soc.*, 2010, **132**, 10903.
3. A. Kamińska, I. Dziegielewski, J. L. Weyher, J. Waluk, S. Gawinkowski, V. Sashuk, M. Fiałkowski, M. Sawicka, T. Suski, S. Porowski and P. Hołyst, *J. Mater. Chem.*, 2011, Advance Article (DOI:10.1039/C0JM03336G)
